# Supplementary material for: Band restructuring of ordered/disordered blue TiO2 for visible light photocatalysis
Source: Royal Society of Chemistry journal article supplement (doi:10.1039/d0ta11505c), 2021-01-01
Supplement: d0ta11505c1.pdf [file d0ta11505c1.pdf]

## Supplementary Information

# **Band restructuring of ordered/disordered blue TiO<sub>2</sub> for visible photocatalyst**

Simgeon Oh,<sup>‡ac</sup> Ji-Hee Kim,<sup>‡\*ac</sup> Hee Min Hwang,<sup>ac</sup> Doyoung Kim,<sup>ac</sup> Joosung Kim,<sup>ac</sup> G. Hwan Park,<sup>ab</sup> Joon Soo Kim,<sup>ac</sup> Young Hee Lee<sup>\*ac</sup> and Hyoyoung Lee<sup>\*ab</sup>

<sup>a</sup>*Center for Integrated Nanostructure Physics (CINAP), Institute for Basic Science (IBS), Sungkyunkwan University, Suwon 16419, Korea*

<sup>b</sup>*Department of Chemistry, Sungkyunkwan University, Suwon 16419, Korea*

<sup>c</sup>*Department of Energy Science, Sungkyunkwan University, Suwon 16419, Korea*

<sup>‡</sup>These authors contribute equally to this work

<sup>\*</sup>Corresponding authors

E-mail: kimj@skku.edu, leeyoung@skku.edu, hyoyoung@skku.edu

Fax: (+) 82-31-299-5934; Tel: (+) 82-31-299-4566

## 1. Phase-selective reduction in single-phase TiO<sub>2</sub>

### 1.1 Crystalline structure

The phase-selectively reduced TiO<sub>2</sub> was carefully confirmed with single-phase TiO<sub>2</sub>. The TiO<sub>2</sub> reductions were conducted using different alkali metal-ethylenediamine solutions. Single-phase anatase and rutile TiO<sub>2</sub> was reduced by lithium-ethylenediamine (Li-EDA) and sodium-ethylenediamine (Na-EDA) solutions, respectively (referred to as Li-reduction or Na-reduction). Each TiO<sub>2</sub> phase was reduced for 1, 3, 5 and 7 days to investigate the band structure as a function of reduction time.

XRD and TEM analyses were carried out to investigate the crystallographic modification resulting from Li and Na reduction. Fig. S1 shows the X-ray diffraction diffractometer (XRD) spectra of 6 samples: pristine anatase and rutile phase TiO<sub>2</sub>, Li-reduced anatase and rutile phase TiO<sub>2</sub>, and Na-reduced anatase and rutile phase TiO<sub>2</sub>, each reduced for 7 days. These spectra showed the different reduction tendencies of anatase and rutile TiO<sub>2</sub> under our reduction reaction. In anatase TiO<sub>2</sub>, the XRD peaks specific to anatase are unchanged with Li-reduction. However, these same peaks are barely evident when anatase is treated with Na-reduction. Meanwhile, rutile TiO<sub>2</sub> showed no XRD peak changes with Na-reduction, but the Li-reduced rutile sample showed decreased rutile peak intensities. Supplementary Table 1 shows the FWHM values of the (101) and (204) peaks in anatase TiO<sub>2</sub> and the (110) and (101) peaks in rutile TiO<sub>2</sub>. High-resolution transmission electron microscopy (HRTEM) unveils ordered and disordered crystalline structures after Li- and Na-reduction, respectively (Fig. S2). These results imply that the TiO<sub>2</sub> disordering rates of Li- and Na-reduction are selectively effective for different TiO<sub>2</sub> crystalline phases. Thus, we denote Li-reduced TiO<sub>2</sub> as crystalline ordered anatase (A<sub>o</sub>) and disordered rutile (R<sub>d</sub>), and Na-reduced TiO<sub>2</sub> as crystalline disordered anatase (A<sub>d</sub>) and ordered rutile (R<sub>o</sub>).

## *1.2. Energy band structure*

The energy band restructuring of Li- and Na-reduced single-phase TiO<sub>2</sub> samples were investigated by diffuse reflectance spectroscopy (DRS) and X-ray photoelectron spectroscopy (XPS) with different reduction times to observe the energy band change with respect to reduction level. DRS provides light absorption information and a deduced Tauc plot, which are essential for energy band gap measurements (Fig. S3). These data show that the anatase and rutile TiO<sub>2</sub> mainly absorb in the UV range due to their large energy band gaps of 3.2 eV and 3.0 eV, respectively, which is in good agreement with previous reports. After TiO<sub>2</sub> reduction treatment, the Li-reduced A<sub>o</sub> and Na-reduced R<sub>o</sub> show slightly increased absorption, but there is almost no bandgap change, while Na-reduced A<sub>d</sub> and Li-reduced R<sub>d</sub> show an enormous absorption increase in the visible spectrum. Furthermore, Na-reduced A<sub>d</sub> and Li-reduced R<sub>d</sub> show energy band tailing in the valence band, which was confirmed by XPS valence band analysis (Fig. S3). The measured energy band structures are summarized in Table S3, showing that our TiO<sub>2</sub> phase-selective reduction method successfully provides energy band restructuring.

## 2. Tables

| Single-phase TiO <sub>2</sub> | A(101)  | A(204)  | R(110)  | R(101)  |
|-------------------------------|---------|---------|---------|---------|
| Pristine                      | 0.3587° | 0.5708° | 0.1466° | 0.1569° |
| 7-day Li-reduction            | 0.4705° | 0.8648° | 0.4792° | 0.5046° |
| 7-day Na-reduction            | 1.4358° | 2.0774° | 0.1682° | 0.1755° |

**Table S1.** Full-width-at-half-maximum values of 7-day Li- and Na-reduced single-phase TiO<sub>2</sub>. Anatase (101), (204) and rutile (110), (101) peaks are measured from single-phase TiO<sub>2</sub> XRD spectra (Fig. S1).

| Phase-mixed TiO <sub>2</sub> | A(101)  | R(110)  |
|------------------------------|---------|---------|
| Pristine                     | 0.3755° | 0.2576° |
| 7-day Li-reduction           | 0.3726° | 0.3921° |
| 7-day Na-reduction           | 0.3942° | 0.2450° |

**Table S2.** Full-width-at-half-maximum variation of the XRD peaks of phase-selectively disordered anatase/rutile TiO<sub>2</sub> after Li- and Na-reduction.

|                | Li-reduction (Single-phase TiO <sub>2</sub> ) |                     |                                      |                     | Na-reduction (Single-phase TiO <sub>2</sub> ) |                     |                                   |                     |
|----------------|-----------------------------------------------|---------------------|--------------------------------------|---------------------|-----------------------------------------------|---------------------|-----------------------------------|---------------------|
| Reduction time | Anatase (ordered, A <sub>o</sub> )            |                     | Rutile (disordered, R <sub>d</sub> ) |                     | Anatase (disordered, A <sub>d</sub> )         |                     | Rutile (ordered, R <sub>o</sub> ) |                     |
|                | VB (eV)                                       | E <sub>g</sub> (eV) | VB (eV)                              | E <sub>g</sub> (eV) | VB (eV)                                       | E <sub>g</sub> (eV) | VB (eV)                           | E <sub>g</sub> (eV) |
| 0-day          | 2.11                                          | 3.18                | 2.00                                 | 3.01                | 2.11                                          | 3.18                | 2.00                              | 3.01                |
| 1-day          | 2.09                                          | 3.2                 | 2.00                                 | 2.98                | 2.09                                          | 3.15                | 2.02                              | 3.00                |
| 3-day          | 2.09                                          | 3.19                | 1.85                                 | 2.96                | 1.94                                          | 3.09                | 1.96                              | 3.00                |
| 5-day          | 2.11                                          | 3.17                | 1.78                                 | 2.93                | 1.85                                          | 2.91                | 2.01                              | 2.98                |
| 7-day          | 2.05                                          | 3.16                | 1.72                                 | 2.88                | 1.87                                          | 2.73                | 2.00                              | 2.98                |

**Table S3.** Measured valence band and energy band gap of single-phase TiO<sub>2</sub> with different Li- and Na-reduction times (Fig. S3).

|                                | Phase reduction time |          |           |           |           |
|--------------------------------|----------------------|----------|-----------|-----------|-----------|
|                                | 0-day (Pristine)     | 1-day    | 3-day     | 5-day     | 7-day     |
| R <sub>s</sub> (Li-reduction)  | 26.54 Ω              | 25.37 Ω  | 25.25 Ω   | 24.66 Ω   | 25.72 Ω   |
| R <sub>ct</sub> (Li-reduction) | 55.16 kΩ             | 69.30 kΩ | 73.49 kΩ  | 101.20 kΩ | 158.10 kΩ |
| R <sub>s</sub> (Na-reduction)  | 26.54 Ω              | 25.27 Ω  | 24.55 Ω   | 24.90 Ω   | 27.10 Ω   |
| R <sub>ct</sub> (Na-reduction) | 55.16 kΩ             | 68.73 kΩ | 140.50 kΩ | 191.20 kΩ | 181.17 kΩ |

**Table S4.** Summarized R<sub>s</sub> and R<sub>ct</sub> values of Li-reduced (A<sub>o</sub>/R<sub>d</sub>) and Na-reduced (A<sub>d</sub>/R<sub>o</sub>) phase-mixed TiO<sub>2</sub> from the electrochemical impedance spectroscopy results (Fig. S14).

| Photocatalyst               | Structure     | Photocatalysis parameters                                                    | H <sub>2</sub> generation rate            | Reference                              |
|-----------------------------|---------------|------------------------------------------------------------------------------|-------------------------------------------|----------------------------------------|
| 3-day Li-reduced P25        | Nanoparticles | <i>No Pt loaded</i><br>3:1 H <sub>2</sub> O/MeOH<br>(1 sun irradiation)      | 0.74 mmol g <sup>-1</sup> h <sup>-1</sup> | Our work                               |
| 3-day Li-reduced Pt-P25     | Nanoparticles | <i>0.04 wt.% Pt load</i><br>3:1 H <sub>2</sub> O/MeOH<br>(1 sun irradiation) | 6.84 mmol g <sup>-1</sup> h <sup>-1</sup> | Our work                               |
| Pt-P25                      | Nanoparticles | <i>0.46 wt.% Pt load</i><br>4:1 H <sub>2</sub> O/MeOH<br>(1 sun irradiation) | 5.71 mmol g <sup>-1</sup> h <sup>-1</sup> | Our work                               |
| Hydrogenated Pt-P25         | Core/shell    | <i>1.0 wt.% Pt load</i><br>4:1 H <sub>2</sub> O/MeOH<br>(1 sun irradiation)  | 3.94 mmol g <sup>-1</sup> h <sup>-1</sup> | RSC Adv., 2014, 4, 1128–1132           |
| Pt-anatase TiO <sub>2</sub> | Core/shell    | <i>0.5 wt.% Pt load</i><br>4:1 H <sub>2</sub> O/MeOH<br>(1 sun irradiation)  | 7.40 mmol g <sup>-1</sup> h <sup>-1</sup> | Energy Environ. Sci., 2014, 7, 967–972 |
| Pt-anatase TiO <sub>2</sub> | Nanowires     | <i>0.5 wt.% Pt load</i><br>10:1 H <sub>2</sub> O/MeOH<br>(UV irradiation)    | 4.30 mmol g <sup>-1</sup> h <sup>-1</sup> | Catal Commun., 2008, 9, 1265–1271      |
| Anatase-rutile Pt-composite | Nanoparticles | <i>0.4 wt.% Pt load</i><br>10:1 H <sub>2</sub> O/MeOH<br>(300W Xe lamp)      | 4.25 mmol g <sup>-1</sup> h <sup>-1</sup> | J. Phys. Chem. C, 2010, 114, 2821–2829 |

**Table S5.** Summary of various Pt-loaded TiO<sub>2</sub> photocatalysts used for the photocatalytic hydrogen evolution reaction.

### 3. Figures

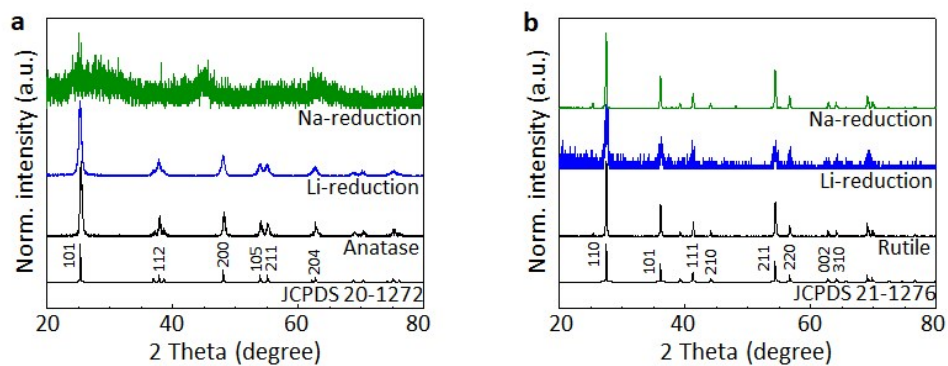

**Fig. S1.** XRD patterns of single-phase  $\text{TiO}_2$  7-day Li- and Na-reduction, (a) anatase  $\text{TiO}_2$  and (b) rutile  $\text{TiO}_2$ .

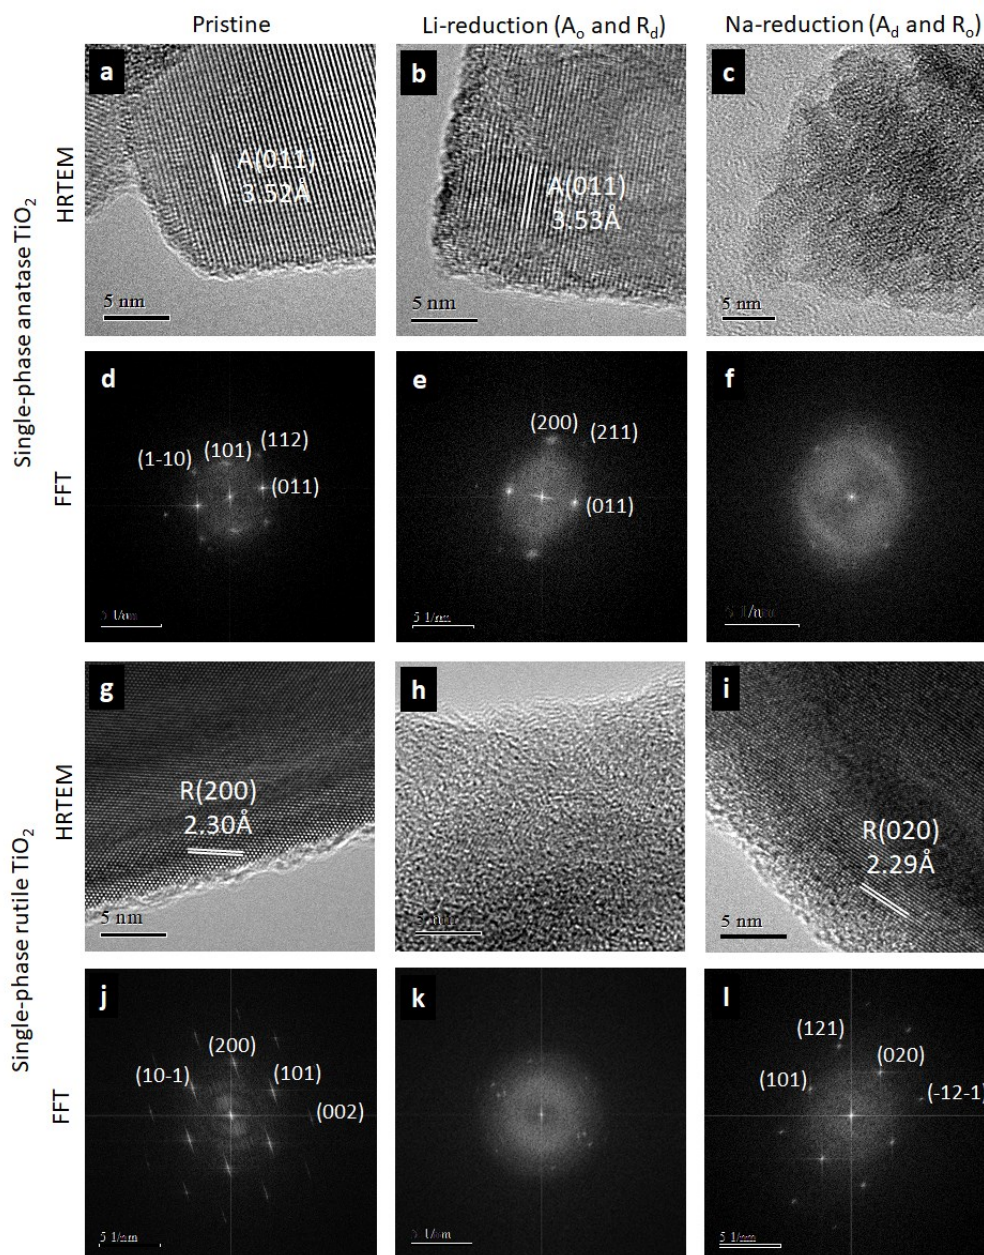

**Fig. S2.** HRTEM images of single-phase  $\text{TiO}_2$ . (a,d,g,j) without reduction, anatase phase (a) and rutile phase  $\text{TiO}_2$  (g); corresponding electron-diffraction FFT pattern (d,j). (b,e,h,k) with the 7-day Li-reduction, anatase phase (b) and rutile phase  $\text{TiO}_2$  (h); corresponding electron-diffraction FFT pattern (e,k). (c,f,i,l) with the 7-day Na-reduction, anatase phase (c) and rutile phase  $\text{TiO}_2$  (i); corresponding electron-diffraction FFT pattern (f,l).



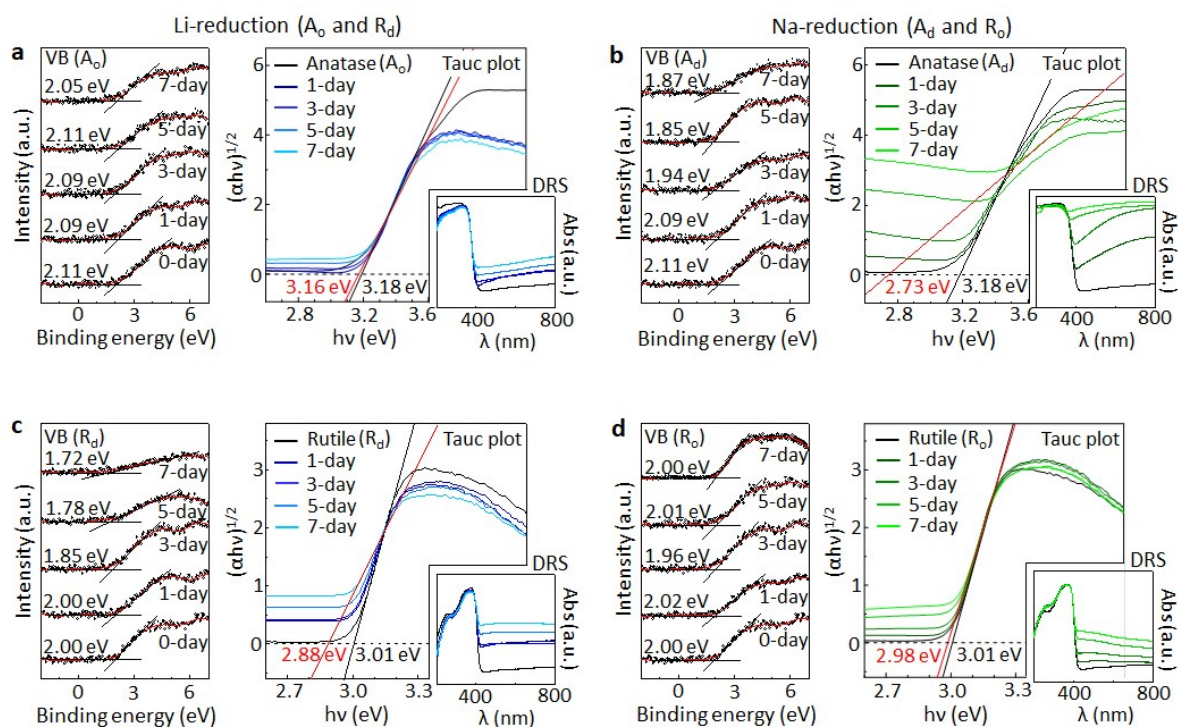

**Fig. S3.** Energy band structure survey with Li- and Na-reduced single-phase  $\text{TiO}_2$ . (a,c) XPS valence band (XPS VB) edge spectra and Tauc plot of single-phase  $\text{TiO}_2$  with Li-reduction for anatase phase  $\text{TiO}_2$  and rutile phase  $\text{TiO}_2$ . (b,d) XPS VB edge spectra of single-phase  $\text{TiO}_2$  with Na-reduction for anatase phase  $\text{TiO}_2$  and rutile phase  $\text{TiO}_2$ . Inset: The DRS spectra.

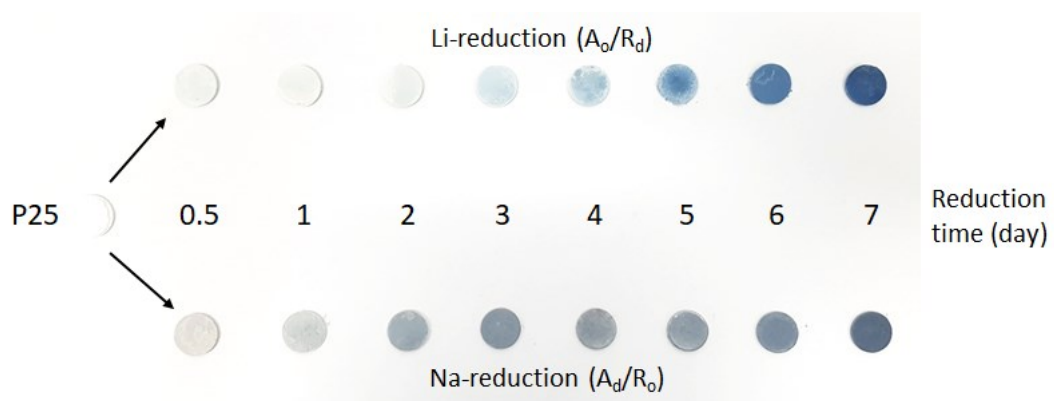

**Fig. S4.** Digital photograph images of pristine P25, Li-reduced ( $A_o/R_d$ , upper line) and Na-reduced ( $A_d/R_o$ , bottom line) phase-mixed  $\text{TiO}_2$  with reduction time evolution. Both colors change from white to deep blue after reduction for 7 days.

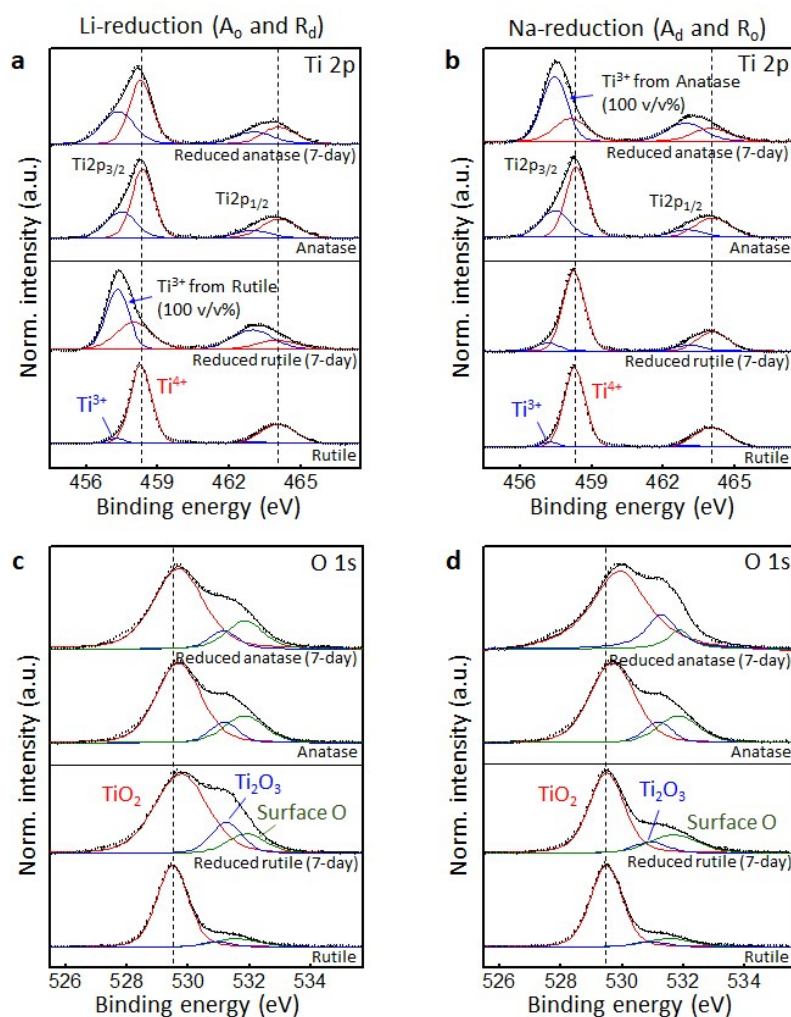

**Fig. S5.** (a,c) XPS core-level spectra of single-phase TiO<sub>2</sub> with 7-day Li-reduction: Ti 2p core-level XPS peaks and O 1s core-level XPS peaks. (b,d) XPS core-level spectra of single-phase TiO<sub>2</sub> with 7-day Na-reduction: Ti 2p core-level XPS peaks and O 1s core-level XPS peaks.

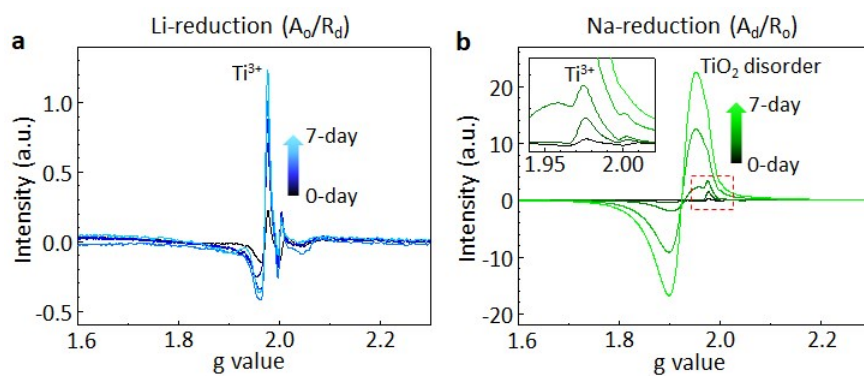

**Fig. S6.** EPR spectra of (a) Li-reduced and (b) Na-reduced anatase/rutile phase-mixed  $TiO_2$  for the relative oxygen vacancies.

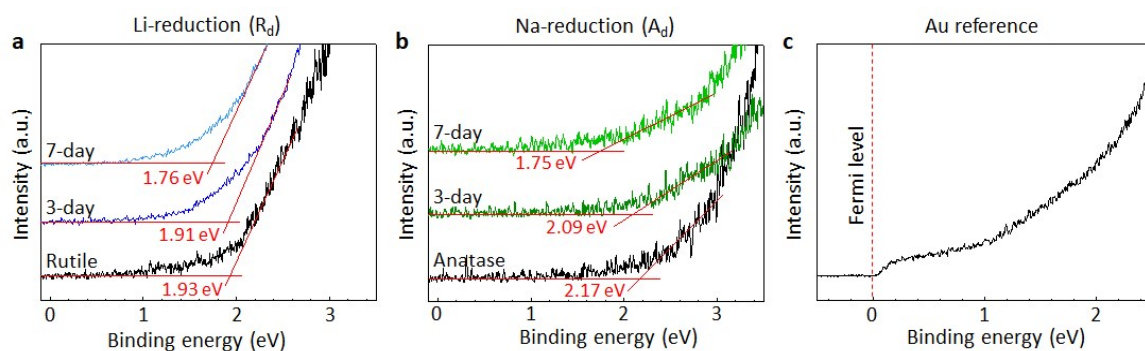

**Fig. S7.** UPS valence band spectra of (a) Li-reduced rutile  $\text{TiO}_2$  ( $R_d$ ) and (b) Na-reduced anatase  $\text{TiO}_2$  ( $A_d$ ) with reduction time evolution. (c) Fermi level reference with Au film.

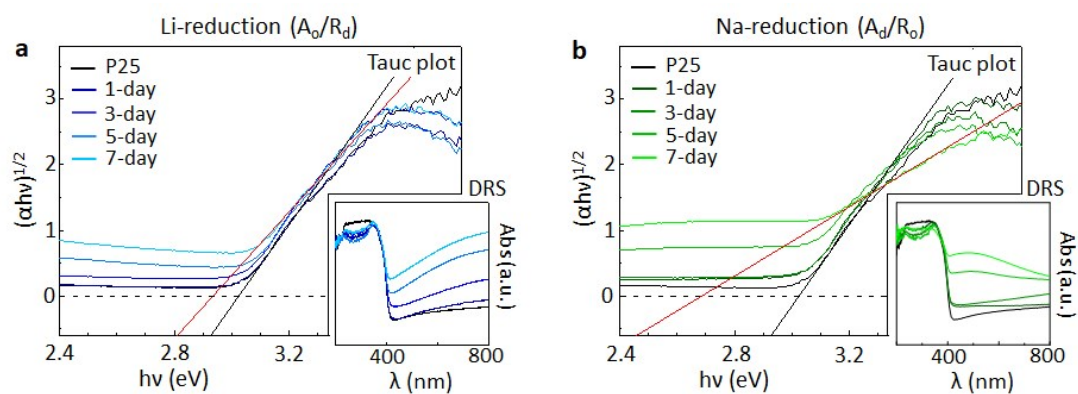

**Fig. S8.** (a) Tauc plots from UPS data, which are used to determine the direct bandgap via  $\sim(\alpha h\nu)^{1/2}$ , of ordered anatase and disordered rutile phase-mixed TiO<sub>2</sub> with Li-reduction ( $A_o/R_d$ ), and (b) disordered anatase and ordered rutile phase-mixed TiO<sub>2</sub> with Na-reduction ( $A_d/R_o$ ). Inset: The DRS spectra.

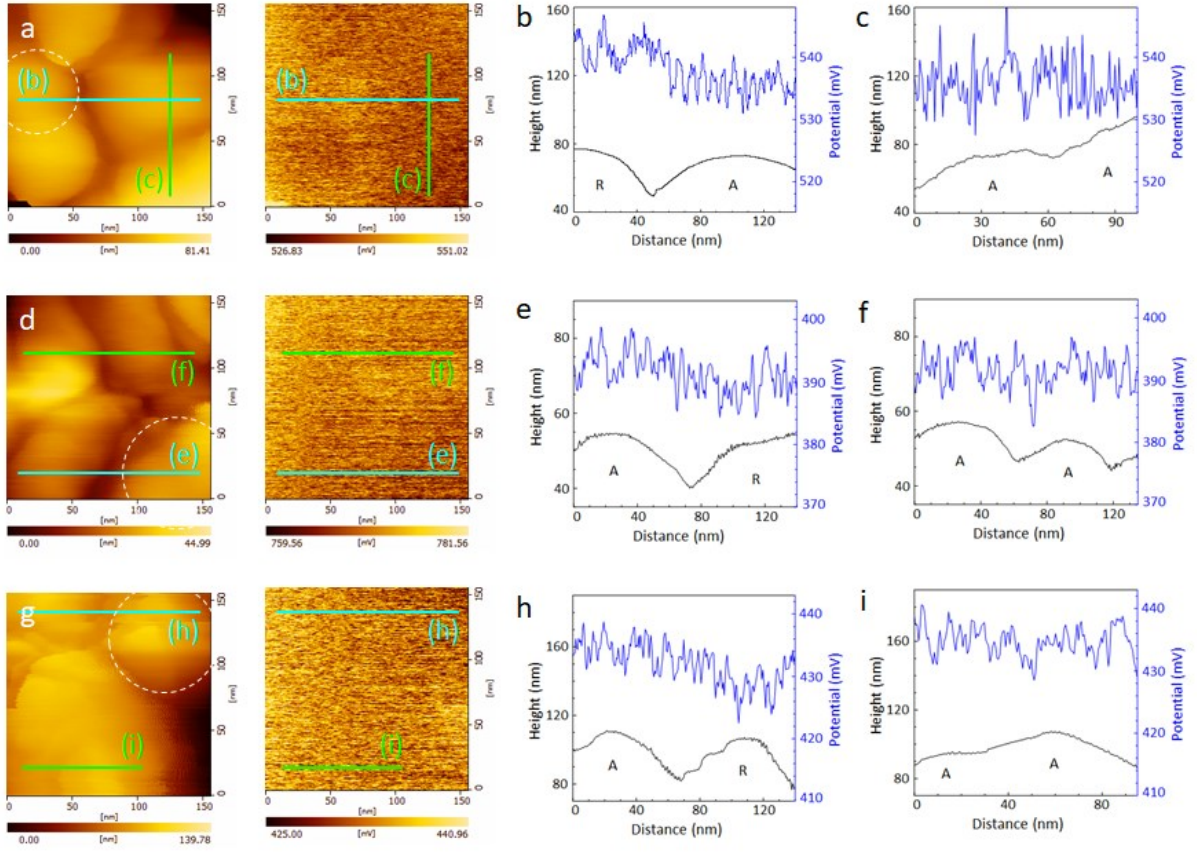

**Fig. S9.** AFM (left) and KPFM mapping (right) image of (a) pristine phase-mixed  $\text{TiO}_2$ , (d) 7-day Li- and (g) Na-reduced  $\text{TiO}_2$ . The line profile of (b, c) pristine phase-mixed  $\text{TiO}_2$ , (e, f) 7-day Li- and (h, i) Na-reduced  $\text{TiO}_2$  for the anatase-rutile and anatase-anatase phase junction interfaces.



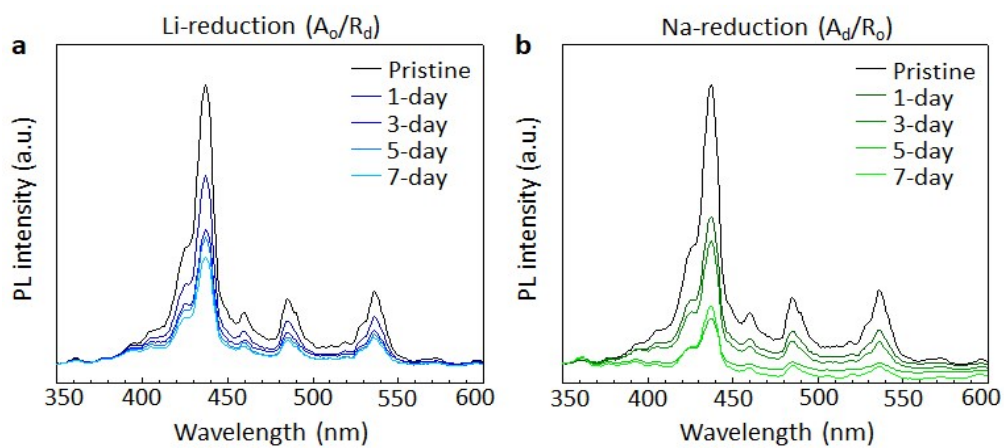

**Fig. S10.** PL spectra of (a) Li-reduced  $\text{TiO}_2$  and (b) Na-reduced  $\text{TiO}_2$  with different reduction time evolution.



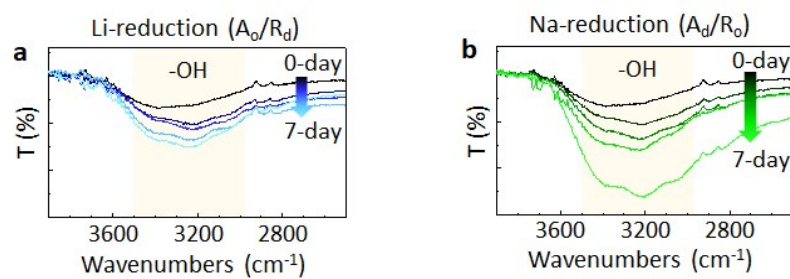

**Fig. S11.** FTIR spectra of phase-mixed  $\text{TiO}_2$  with (a) Li-reduction ( $A_0/R_d$ ) and (b) Na-reduction ( $A_d/R_0$ ).

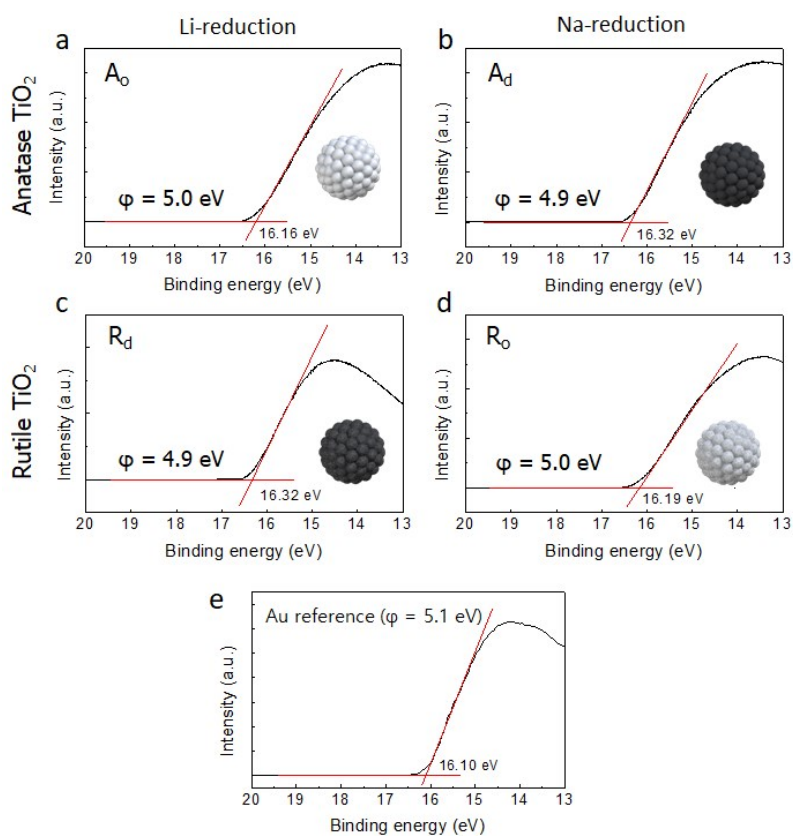

**Fig. S12.** The UPS cut-off region results for workfunctions measurement of single-phase  $\text{TiO}_2$  after (a,c) 7-day Li-reduction and (b,d) 7-day Na-reduction. (e) UPS result of Au reference.

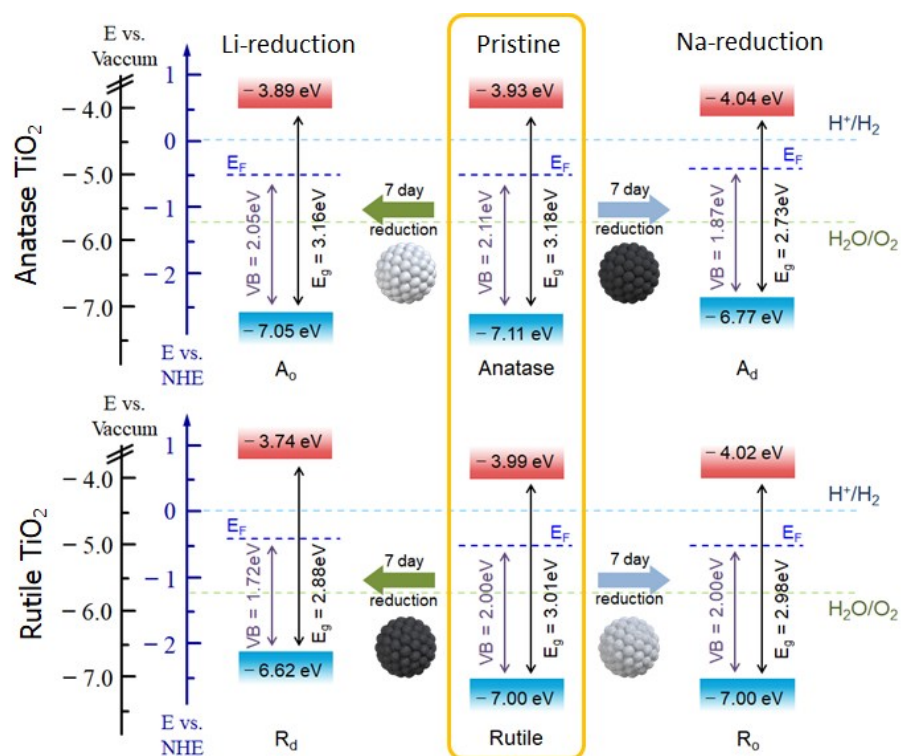

**Fig. S13.** Summarized energy band diagram of 7-day ordered and disordered single-phase  $\text{TiO}_2$  to compare the CB position of  $\text{TiO}_2$  and reduction potential of hydrogen for p-HER.

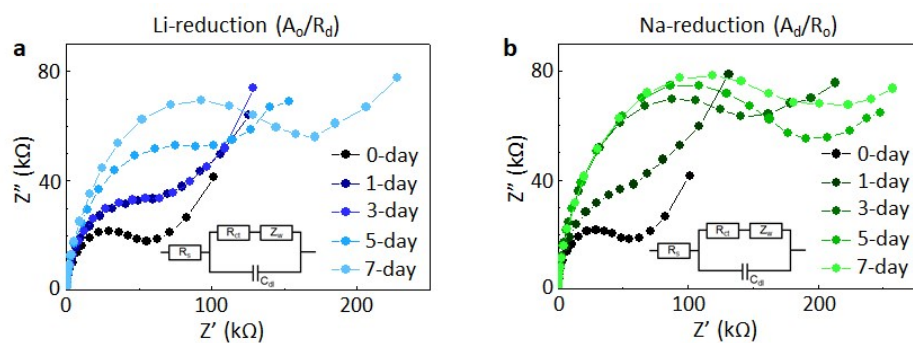

**Fig. S14.** Electrochemical impedance spectroscopy (EIS) spectra of phase-mixed  $\text{TiO}_2$  with (a) Li-reduction ( $A_0/R_d$ ), and (b) Na-reduction ( $A_d/R_o$ ). Inset: The equivalent circuit model.

$R_s$  and  $R_{ct}$  values are served in Table S4.

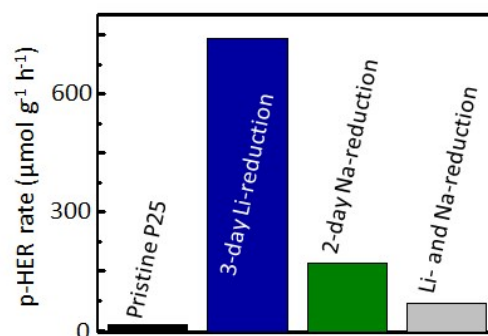

**Fig. S15.** p-HER results of pristine phase-mixed  $\text{TiO}_2$  (P25) and phase-mixed  $\text{TiO}_2$  with 3-day Li-reduction ( $A_o/R_d$ ), 2-day Na-reduction ( $A_d/R_o$ ), and 3-day Li- and then Na-reduction treatment ( $A_d/R_d$ ).

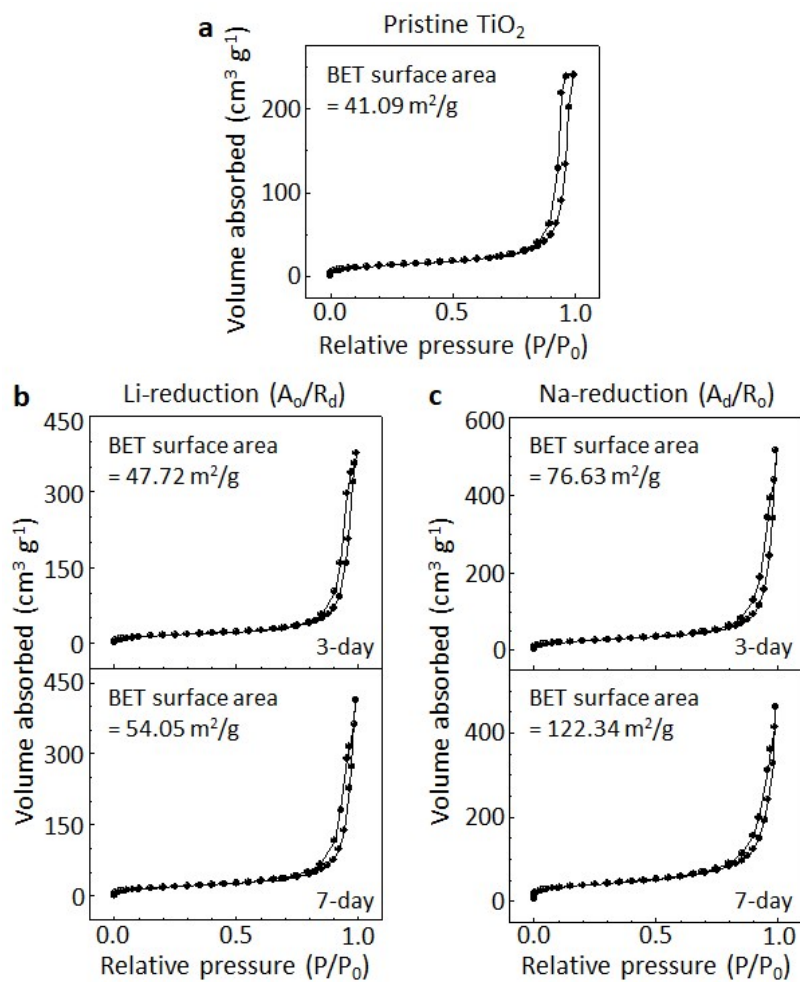

**Fig. S16.** N<sub>2</sub> adsorption–desorption isotherms of (a) Pristine P25 TiO<sub>2</sub>, (b) Li-reduced TiO<sub>2</sub> and (c) Na-reduced TiO<sub>2</sub> as a function of the phase-selective TiO<sub>2</sub> reduction time.

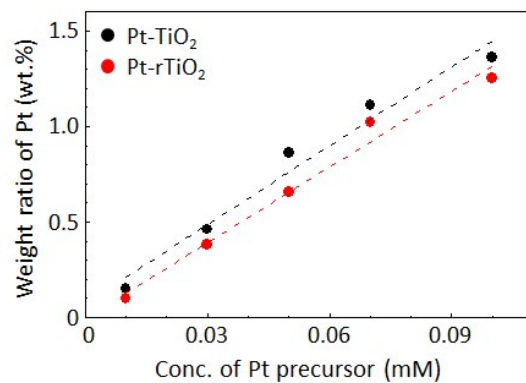

**Fig. S17.** Calibration curves of the weight ratio of Pt on Pt-TiO<sub>2</sub> and Pt-rTiO<sub>2</sub> with different concentrations of Pt precursor solution employed for photodeposition.

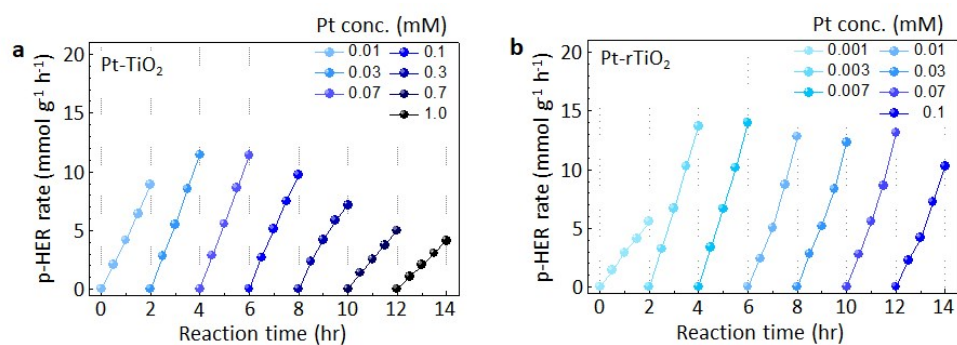

**Fig. S18.** p-HER performance as a function of Pt precursor concentration (mM) in the photodeposition solution with (a) Pt co-catalyst deposited on pristine P25 (Pt-TiO<sub>2</sub>), and (b) phase-mixed TiO<sub>2</sub> with 3-day Li-reduction (Pt-rTiO<sub>2</sub>).
